# Supplementary material for: Synthesis and Photocatalytic Activity of High-Quality Lead(II) Sulfide Nanoparticles from Lead(II) Thiosemicarbazone Complexes as Single Source Precursors
Source: Hindawi journal article supplement (doi:10.1155/2024/9932000), 2024-02-02
Supplement: f1 [file 9932000.f1.docx]

**Synthesis and Photocatalytic activity of High-quality lead(II) sulphide nanoparticles from lead(II) thiosemicarbazone complexes as single source precursors**

Adrien P. Yepseu1,2, Thomas Girardet2, Linda D. Nyamen1 , Solenne Fleutot2, Kevin I.Y. Ketchemen1, Walter N Kun1, Franck Cleymand2* and Peter T. Ndifon1*

*1Department of Inorganic Chemistry, University of Yaoundé I, P.O. Box 812, Yaoundé, Cameroon.*

*2Institut Jean Lamour UMR 7198 CNRS – Université de Lorraine Campus Artem, 2 allée André Guinier, 54000 Nancy, France.*

**e-mail: pndifon@facsciences-uy1.cm; franck.cleymand@univ-lorraine.fr*

**Supplementary Data**









**(c)**

**(b)**

**(a)**

**Figure S1.** SAED patterns of nanoparticles prepared in OLA at 190 °C, 230 °C and 270 °C from complex **(2)**.


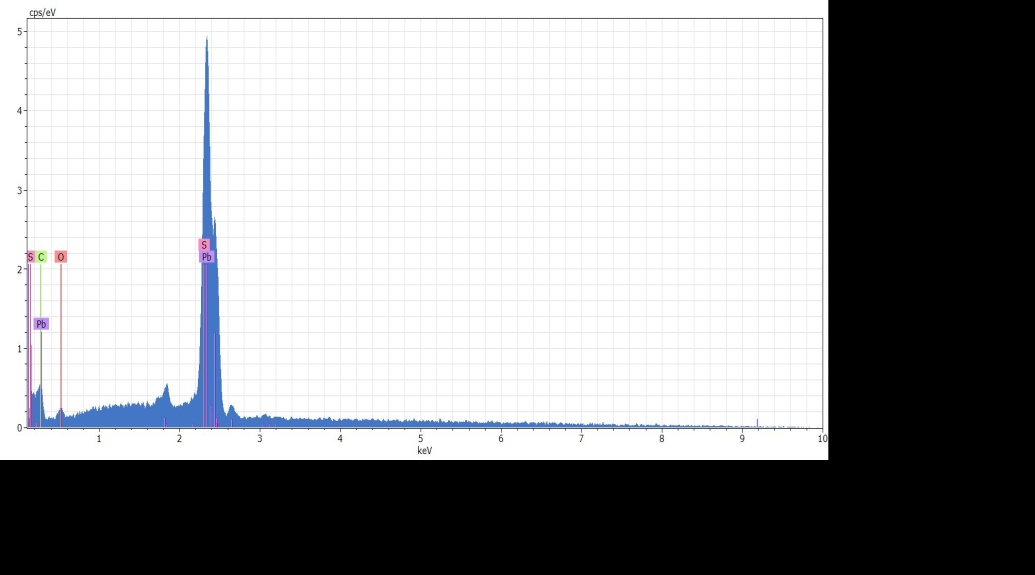


**(i)**


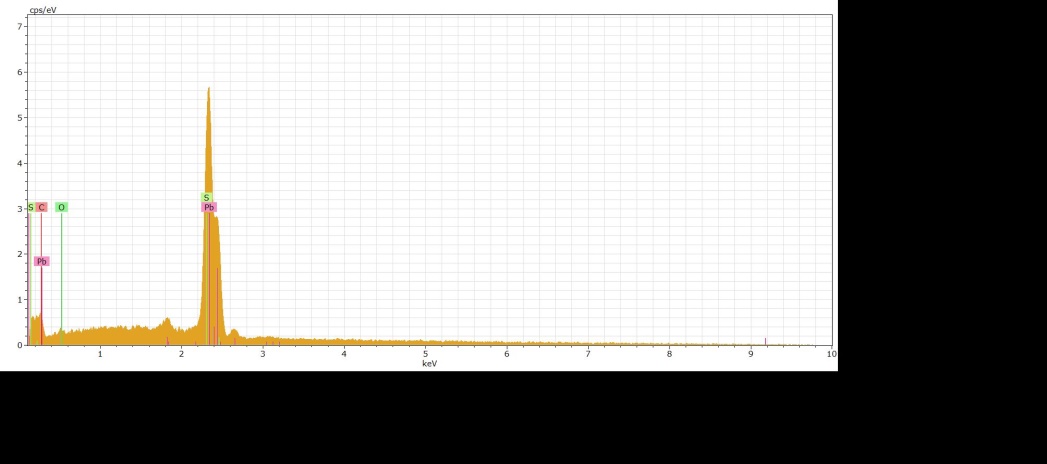
**Figure S2.** EDX spectra of PbS nanoparticles prepared in HDA at 190 °C using complex **(1)** and complex **(2)**.

**(ii)**









**(a)**

**(b)**

**(c)**

**Figure S3.** SAED patterns of nanoparticles prepared in HDA at 190 °C, 230 °C and 270 °C from complex **(2)**.

**(c)**

**(b)**

**(a)**


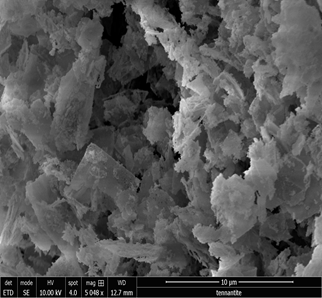

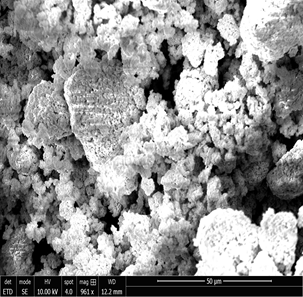

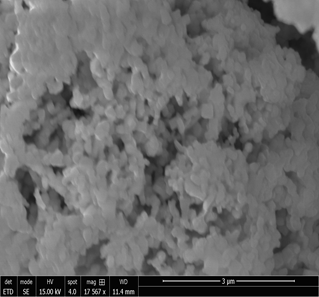

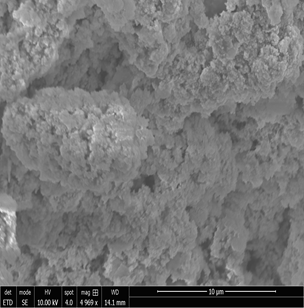

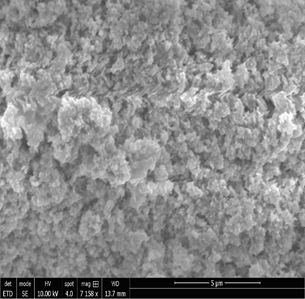
**
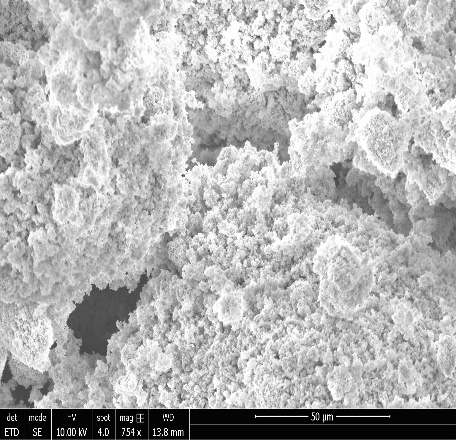
**

**10 µm**

**50 µm**

**50 µm**

**5 µm**

**10 µm**

**3 µm**

**(f)**

**(e)**

**(d)**

**Figure S4.** SEM images of PbS nanoparticles prepared in HDA at 190 °C (a, d), 230 °C (b, e), 270 °C (c, f) using the complexes (1) and (2).

**Figure S5.** UV-Vis absorption spectra for methylene blue photodegradation using (HDA)-capped PbS nanoparticles.
